# Supplementary material for: Recording Lifetime Behavior and Movement in an Invertebrate Model
Source: PLoS One. 2011 Apr 12;6(4):e18151. doi: 10.1371/journal.pone.0018151 (PMC3075241; doi:10.1371/journal.pone.0018151)
Supplement: Table S2 — Summary statistics for validation studies of the BMS. (XLSX) [file pone.0018151.s002.xlsx]

## Sheet: Sheet1
			Table S2. Summary statistics for validation studies of the BMS.
					Technician							BMS
					Resting: 100%	Moving:	Walking	Flying	Feeding:	Drinking: none observed by human or machine		Resting: 100%	Moving:	Walking	Flying	Feeding:	Drinking: none observed by human or machine
			Total events		237	192	128	98	11			237	199	126	109	9
			Missed by BMS				2	1	2
			Accuracy		100	100	98.4375	98.9796	81.8182
					Technician							BMS
					Resting	Moving	Walking	Flying	Feeding:			Resting: 100%	Moving:	Walking	Flying	Feeding:
			Day 1 total		36	27	15	12	1			36	30	15	14	2
			Day 2 total		34	24	23	19	0			34	25	23	23	0
			Day 3 total		33	31	23	16	2			33	31	23	16	2
			Day 4 total		31	27	20	17	1			31	30	19	17	1
			Day 5 total		36	28	18	14	2			36	28	17	14	0
			Day 6 total		35	31	15	10	4			35	31	15	14	3
			Day 7 total		32	24	14	10	1			32	24	14	11	1
					Resting: 100%	Moving:	Walking	Flying	Feeding:
	Missed by BMS		Day 1 total		0	0	0	0	0			Paired t-test
			Day 2 total		0	0	0	0	0			Hypothesized Difference = 0
			Day 3 total		0	0	0	0	0				Mean Diff.	DF	t-Value	P-Value
			Day 4 total		0	0	1	0	0			Resting: 100%, Resting 100%	0	6	.	.
			Day 5 total		0	0	1	1	2			Moving:, Moving	-1	6	-1.871	0.1106
			Day 6 total		0	0	0	0	0			Flying, Flying.2	-1.571	6	-2.294	0.0616
			Day 7 total		0	0	0	0	0			Walking, Walking.2	0.286	6	1.549	0.1723
					Resting: 100%	Moving:	Walking	Flying	Feeding:			Feeding:, Feeding	0.143	6	0.447	0.6627
	Accuracy		Day 1 total		100	100	100	100	100
			Day 2 total		100	100	100	100	100
			Day 3 total		100	100	100	100	100
			Day 4 total		100	100	95	100	100
			Day 5 total		100	100	94.4444	92.8571	0
			Day 6 total		100	100	100	100	100
			Day 7 total		100	100	100	100	100
			Average
					Resting: 100%	Moving:	Walking	Flying	Feeding:
	Missed by technician		Day 1 total		0	3	0	2	1
			Day 2 total		0	1	0	4	0
			Day 3 total		0	0	0	0	0
			Day 4 total		0	3	-1	0	0
			Day 5 total		0	0	-1	0	-2
			Day 6 total		0	0	0	4	-1
			Day 7 total		0	0	0	1	0
					Resting: 100%	Moving:	Walking	Flying	Feeding:
	Missing rate by technician		Day 1 total		100	90	100	85.7143	50
			Day 2 total		100	96	100	82.6087	NA
			Day 3 total		100	100	100	100	100
			Day 4 total		100	90	NA	100	100
			Day 5 total		100	100	NA	100	NA
			Day 6 total		100	100	100	71.4286	133.333
			Day 7 total		100	100	100	90.9091	100
			NA: not applicable.
