# Supplementary material for: Recording Lifetime Behavior and Movement in an Invertebrate Model
Source: PLoS One. 2011 Apr 12;6(4):e18151. doi: 10.1371/journal.pone.0018151 (PMC3075241; doi:10.1371/journal.pone.0018151)
Supplement: Table S3 — Metrics corresponding to leaves in the dendrogram depicted in Figure 3. (XLSX) [file pone.0018151.s003.xlsx]

## Sheet: Sheet1
Table S3. Metrics corresponding to leaves in the dendrogram depicted in Fig. 3
Fly Age Bin	Resting	Moving	Walking	Flying	AgeBins	Clusters
2010-01-10	230.477	26.1533	42.5985	0.771334	1	Set 1
2010-11-20	195.814	29.0339	73.0586	1.85887	11	Set 2
21-30	189.835	29.4339	78.5383	2.19292	21	Set 2
31-40	200.94	26.0752	71.1588	1.78712	31	Set 2
41-50	199.77	26.4493	72.0901	1.64043	41	Set 2
51-60	211.976	27.3271	59.2966	1.40022	51	Set 1
61-70	218.873	25.7727	54.1006	1.25409	61	Set 1
71-80	223.209	27.7554	47.8781	1.11891	71	Set 1
81-90	227.13	27.0433	44.719	1.01385	81	Set 1
91-100	225.854	27.8835	45.3083	0.954404	91	Set 1
101-110	233.449	26.9265	38.3633	1.09268	101	Set 1
111-120	237.078	26.9757	34.4325	0.981965	111	Set 1
121-130	251.31	23.9365	24.0744	0.679421	121	Set 3
131-140	247.085	28.9408	23.4199	0.554329	131	Set 3
141-150	256.633	24.2561	18.6197	0.491518	141	Set 3
151-160	247.165	28.6516	23.546	0.637304	151	Set 3
161-170	261.722	21.9105	15.6037	0.569758	161	Set 3
171-180	253.214	33.3815	12.8566	0.54812	171	Set 3
181-190	258.821	34.8323	5.8879	0.459244	181	Set 3
191-200	269.41	25.3388	4.68911	0.562456	191	Set 3
201-210	271.061	27.3934	1.23791	0.307644	201	Set 3
*Resting / Moving / Walking / and Flying behaviors are 10-day averages of the 300 datapoints collected per 1-minute bouts of recording during hours when cage lights were on (7am-7pm).
